# Supplementary material
Source: ML conference proceedings conference paper supplement (https://openaccess.thecvf.com/content/CVPR2024/html/Yang_RegionPLC_Regional_Point-Language_CVPR_2024_paper.html)
Supplement: Supplementary file 1 [file Yang_RegionPLC_Regional_Point-Language_CVPR_2024_supplemental.pdf]

# RegionPLC: Regional Point-Language Contrastive Learning for Open-World 3D Scene Understanding

## Supplementary Material

### Outline

In this supplementary file, we provide more experimental results and details not elaborated in our main paper due to page length limits:

- Sec. **S1**: Implementation details of RegionPLC and baseline methods.
- Sec. **S2**: Additional experimental results on per-class performance, zero-shot domain transfer results, and error-bar analysis.
- Sec. **S3**: Qualitative results of RegionPLC.
- Sec. **S4**: Prompts for LLM in RegionGR.
- Sec. **S5**: Limitation and open problems.

### S1. Implementation Details

Here, we present the implementation details of our RegionPLC, dataset category partition and the implementation of baseline methods.

#### S1.1. Implementation Details of RegionPLC

**Network Architecture.** The network architecture of RegionPLC is the same as PLA [5] (*i.e.* SparseUNet16), ensuring a fair comparison on ScanNet [4]. For ScanNet200 [13], we augment the base hidden dimension (*i.e.* the hidden dimension of the bottleneck) of sparse UNet from 16 to 32 (*i.e.* SparseUNet32), yielding better performance on this complex, long-tail dataset. In nuScenes [2], we adopt the same backbone used in ScanNet200 with 5 residual blocks and a base hidden dimension of 32. In addition, in the base-annotated open-world setting, we follow PLA [5] to employ the binary encoder with binary loss, classification head with semantic segmentation loss and instance head with instance loss on base categories.

**Training Schedule.** We train 512 epochs on ScanNet and ScanNet200, and 50 epochs on nuScenes for semantic segmentation, and 640 epochs for ScanNet instance segmentation. The initial learning rate is set as 0.004 for ScanNet and ScanNet200 and 0.01 for nuScenes. The learning rate decays in cosine and polynomials on ScanNet and nuScenes, respectively.

**Regional 3D-Language pairs.** Regarding vision-language (VL) models that generate captions, we use OFA [15] for generating  $t^{sw}$  and  $t^{det-c}$  as the caption model. As for the object proposal in  $t^{det-t}$  and  $t^{det-c}$ , we use Detic [18] with LVIS [7] vocabulary space. The prompt template of  $t^{det-t}$  is the same as CLIP [12]. Other VL foundation models

are also feasible, and a more robust VL foundation model should enhance our methods’ performance through providing higher-quality object proposals and language descriptions. By default, we use 125K frames in the ScanNet dataset and all images in the nuScenes dataset to extract their regional captions, respectively.

**Inference Cost Analysis.** In the annotation-free setting of the main paper, we evaluate the efficiency of open-world models in terms of training hours (on 8 NVIDIA A100 GPUs), extra storage usage and inference latency (on a single NVIDIA 2080Ti GPU), since they impose a significant overhead during training or inference. The extra storage for RegionPLC and PLA [5] is to store 3D-language pairs, while for OpenScene [10] is to save fused 2D features.

**Category Prompt in nuScenes.** We use a category prompt for nuScenes to replace ambiguous words within the category names such as “manmade” and “driveable\_surface”. The concrete category mapping is illustrated in Table S1.

| Category Name        | Category Prompts                                                                        |
|----------------------|-----------------------------------------------------------------------------------------|
| barrier              | barrier or fence                                                                        |
| bicycle              | bicycle or bike or cycle                                                                |
| bus                  | bus                                                                                     |
| car                  | car                                                                                     |
| construction_vehicle | construction vehicle or bulldozer or excavator or concrete mixer or crane or dump truck |
| motorcycle           | motorcycle or motorbike                                                                 |
| pedestrian           | person or people or man or woman                                                        |
| traffic_cone         | traffic cone                                                                            |
| trailer              | trailer                                                                                 |
| truck                | truck                                                                                   |
| driveable_surface    | road or street                                                                          |
| other_flat           | other flat                                                                              |
| sidewalk             | sidewalk                                                                                |
| terrain              | grass or rolling hills or soil or gravel                                                |
| manmade              | building or wall or fence or pole or sign or traffic light                              |
| vegetation           | bushes or plants or trees or potted plants                                              |

Table S1. The category prompt for nuScenes.

#### S1.2. Category Partition for Base-annotated Results

In the base-annotated open-world setting, we divide all categories into base and novel. As for ScanNet [4], we fol-

| Partition | Base Categories                                                                                                            | Novel Categories                                        |
|-----------|----------------------------------------------------------------------------------------------------------------------------|---------------------------------------------------------|
| B12/N3    | barrier, bicycle, bus, car, construction_vehicle, trailer, truck, diveable_surface, sidewalk, terrain, manmade, vegetation | traffic_cone, motorcycle, pedestrian                    |
| B10/N5    | bicycle, bus, car, construction_vehicle, trailer, truck, driveable_surface, terrain, manmade, vegetation                   | barrier, motorcycle, pedestrian, traffic_cone, sidewalk |

Table S2. Category partitions for open-world semantic segmentation on nuScenes.

| Partition | Novel Categories                                                                                                                                                                                                                                                                                                                                                                                                                                                                                                                              |
|-----------|-----------------------------------------------------------------------------------------------------------------------------------------------------------------------------------------------------------------------------------------------------------------------------------------------------------------------------------------------------------------------------------------------------------------------------------------------------------------------------------------------------------------------------------------------|
| B170/N30  | pillow, box, clothes, counter, dresser, keyboard, backpack, printer, shower curtain, bin, copier, sofa chair, recycling bin, clock, guitar, set, ladder, cup, toaster, ironing board, toilet seat cover dispenser, furniture, cart, projector, shower floor, laundry detergent, bathroom stall door, dumbbell, folded chair, mattress                                                                                                                                                                                                         |
| B150/N50  | couch, window, bookshelf, coffee table, kitchen cabinet, clothes, counter, end table, bag, backpack, printer, microwave, shoe, bin, washing machine, sofa chair, paper, blinds, radiator, recycling bin, soap dispenser, bucket, stand, light, pipe, bathroom stall, cup, storage bin, coffee maker, machine, fireplace, mini fridge, hat, cart, light switch, decoration, plunger, stuffed animal, dish rack, broom, range hood, water pitcher, paper bag, bathroom vanity ceiling light, trash bin, stair rail, coat rack, calendar, poster |

Table S3. Novel Categories for open-world semantic segmentation on ScanNet200. We only present novel categories here as there are too many base categories to show here. The partition of base categories can be easily obtained by carrying on the set difference between all categories and novel categories.

low the category partition of PLA [5]. As for nuScenes [2], we discard the ambiguous category “otherflat” and split the remaining 15 categories as illustrated in Table S2. We also randomly split 30 and 50 novel categories for ScanNet200 [13], as shown in Table S3. Notably, 11 categories absent from the ScanNet200 validation set are consistently partitioned into base categories (*i.e.* training set) to guarantee sufficient novel categories for validation. These 11 train-only categories in ScanNet200 are “bicycle”, “storage container”, “candle”, “guitar case”, “purse”, “alarm clock”, “music stand”, “cd case”, “structure”, “storage organizer” and “luggage”.

### 076 S1.3. Implementation of Baseline Methods

077 We re-produce the baseline methods including  
078 MaskCLIP [17], PointCLIP-Seg [16] and OpenScene [10]  
079 for annotation-free open-world semantic segmentation in  
080 ScanNet. Details are as follows.

081 **PointCLIP-Seg and MaskCLIP.** To apply MaskCLIP [17]  
082 on 3D segmentation, we assemble its predictions on multi-  
083 view images and back-project them to 3D space as [5]. As  
084 for PointCLIP [16], it cannot be directly utilized for the se-  
085 mantic segmentation task, so we extend a segmentation ver-  
086 sion by modifying the attentive pooling layer of CLIP [12],  
087 as per the method used in MaskCLIP [17]. It is named as  
088 PointCLIP-Seg. The major distinction between PointCLIP-  
089 Seg and MaskCLIP lies in that PointCLIP-Seg uses depth  
090 images rather than RGB images for extracting 2D features.

091 **OpenScene.** We use the official fused feature released by  
092 OpenScene [10] and its prompt engineering techniques to

obtain OpenScene-2D results. To ensure a fair comparison, we train OpenScene-3D using the same training schedule and 3D backbone as our RegionPLC. This allows us to compare performance under the same conditions and analyze the results more accurately.

**PLA.** As for PLA [5] in the annotation-free open-world setting, we only carry on the point-language contrastive learning and discard its binary encoder as there is no annotated base category in the training set.

### 102 S1.4. Comparisons of 3D Open-world Scene Under- 103 standing Methods

As shown in Table S4, we compare our RegionPLC to other three cutting-edge 3D open-world scene understanding methods: ConceptFusion [8], OpenScene [10] and PLA [5]. ConceptFusion [8] relies on a multi-view fusion of image predictions during its inference phase. However, its inability to learn from 3D point clouds makes it difficult to extract 3D geometric information. On the other hand, OpenScene-3D [10] can learn directly from the 3D point cloud, but this approach necessitates significant additional storage for saving fused 2D features, making it unsuitable for handling large-scale datasets. Furthermore, the ceiling of its performance is limited by the 2D semantic feature and distillation strategy, making it harder to integrate with more advanced 3D backbones. PLA [5], while only requiring minimal additional storage and being scalable due to only 3D-language supervisions during training, is restricted in its performance by the sparseness and roughness of its language supervisions. In contrast, our RegionPLC inherits all the strengths of PLA [5] and incorporates more advanced

| Method            | 2D models                             | Multi-view inference | Learning in 3D | Scale up with better 3D backbone | Extra storage | Supervision                 |
|-------------------|---------------------------------------|----------------------|----------------|----------------------------------|---------------|-----------------------------|
| ConceptFusion [8] | Mask2Former [3] & CLIP [12]           | ✓                    | ×              | ×                                | ×             | ×                           |
| OpenScene-3D [10] | LSeg [9] & OpenSeg [6]                | ×                    | ✓              | ×                                | high          | Pixel-aligned 2D features   |
| PLA [5]           | VIT-GPT2 [1]                          | ×                    | ✓              | ✓                                | low           | Sparse language supervision |
| RegionPLC         | OFA [15] & Detic [18] & Kosmos-2 [11] | ×                    | ✓              | ✓                                | low           | Dense language supervision  |

Table S4. Comparison between different 3D open-world scene understanding methods.

| Method    | Partition | wall | floor | cabinet | bed  | chair | sofa | table | door | window | bookshelf | picture | counter | desk | curtain | fridge | shower c. | toilet | sink | bathub |
|-----------|-----------|------|-------|---------|------|-------|------|-------|------|--------|-----------|---------|---------|------|---------|--------|-----------|--------|------|--------|
| PLA [5]   | B15/N4    | 84.6 | 95.0  | 64.9    | 81.1 | 87.9  | 75.9 | 72.2  | 61.9 | 62.1   | 69.5      | 30.9    | 60.1    | 46.5 | 70.7    | 50.5   | 66.1      | 56.8   | 59.0 | 81.7   |
|           | B12/N7    | 84.7 | 95.1  | 65.3    | 57.8 | 44.2  | 75.9 | 34.5  | 62.5 | 62.3   | 62.1      | 20.5    | 57.8    | 61.4 | 72.4    | 47.9   | 64.9      | 85.9   | 28.4 | 69.6   |
|           | B10/N9    | 83.8 | 95.2  | 64.3    | 80.9 | 88.0  | 78.5 | 73.2  | 60.6 | 61.5   | 68.6      | 17.7    | 23.4    | 51.3 | 70.6    | 25.7   | 38.2      | 51.3   | 27.3 | 61.7   |
| RegionPLC | B15/N4    | 84.2 | 95.1  | 66.6    | 81.2 | 88.2  | 81.3 | 72.6  | 61.4 | 60.7   | 75.3      | 30.4    | 57.7    | 53.4 | 70.6    | 46.1   | 64.6      | 72.6   | 59.4 | 84.0   |
|           | B12/N7    | 84.9 | 95.1  | 65.2    | 76.3 | 79.5  | 75.8 | 64.3  | 60.0 | 64.3   | 77.9      | 31.1    | 56.7    | 65.7 | 72.7    | 49.5   | 65.6      | 83.4   | 55.5 | 81.9   |
|           | B10/N9    | 84.3 | 95.2  | 65.5    | 80.6 | 89.2  | 82.7 | 73.8  | 59.6 | 62.0   | 79.7      | 25.0    | 47.7    | 56.3 | 69.8    | 38.0   | 53.2      | 74.4   | 46.6 | 78.9   |

Table S5. Per-class results of base-annotated open-world 3D semantic segmentation on ScanNet in terms of IoU. Performance on novel categories is marked in blue.

123 2D models for regional 3D-language association, thereby  
124 boosting its open-world capability.

## 125 S2. More Experimental Results

126 In this section, we present some supplementary experimen-  
127 tal results, in addition to the ones provided in our main  
128 paper. This part consists of a detailed analysis of the per-  
129 class performance, an error-bar analysis and the zero-shot  
130 domain transfer experiments.

### 131 S2.1. Per-category Results

132 Here, we show the per-category performance comparison  
133 between PLA [5] and RegionPLC for base-annotated open-  
134 world 3D semantic segmentation on ScanNet [4]. As shown  
135 in Table S5, our RegionPLC obtains improvements on all  
136 novel categories across different partitions, which demon-  
137 strates its effectiveness.

### 138 S2.2. Error Bar

139 Here, we provide an error bar for our open-world 3D  
140 scene understanding framework on both base-annotated and  
141 annotation-free settings by reproducing each experiment 3  
142 times. As shown in Table S6, the performance of Region-  
143 PLC is generally stable on ScanNet open-world segmenta-  
144 tion, demonstrating its robustness.

### 145 S2.3. Zero-shot Domain Transfer

146 We study the zero-shot domain generalization capability  
147 of open-world methods by transferring the ScanNet-trained

model to S3DIS without fine-tuning. As shown in Table S7,  
RegionPLC enjoys 6.8%  $\sim$  37.1% boosts compared to  
PLA [5] in mIoU<sup>†</sup> on different splits. Notice that more  
base categories on ScanNet can hinder the generalization  
on S3DIS, indicating that dataset-specific annotation penal-  
izes the model’s transferability. In contrast, solely learning  
from semantic-rich caption supervision achieves great out-  
of-domain generalization ability.

## 150 S3. Qualitative Results for Annotation-free 151 Open World

152 Here, we provide more qualitative results of RegionPLC in  
153 the most challenging annotation-free open-world scenario.  
154 As shown in Figure S1, our RegionPLC can distinguish dif-  
155 ferent semantics with remarkable segmentation results cov-  
156 ering a wide range of categories.

157 On the other hand, we also explore the potential of our  
RegionPLC to discover tail and rare categories in real-world  
scenarios. As shown in Figure S2, we visualize the heat  
maps of the point-wise response given a text query. Our Re-  
gionPLC can discover a lot of tail categories such as “trash  
can”, “shoe” and “nightstand” without any human anno-  
tation. These results demonstrate the effectiveness of our  
regional point-language contrastive learning framework in  
solving open-world 3D scene understanding problems.

## 172 S4. Prompts for RegionGR

173 As highlighted in the main paper, our RegionPLC is capa-  
174 ble of incorporating large language models (LLM), such as

| Round | Base-annotated ScanNet [4] |                    |                    | Annotation-free ScanNet [4] |
|-------|----------------------------|--------------------|--------------------|-----------------------------|
|       | B15/N4                     | B12/N7             | B10/N9             |                             |
| 1     | 69.4 / 68.2 / 70.7         | 68.2 / 69.9 / 66.6 | 64.3 / 76.3 / 55.6 | 59.6 (77.5)                 |
| 2     | 69.5 / 68.6 / 70.4         | 67.6 / 69.8 / 65.4 | 63.9 / 76.4 / 54.9 | 59.2 (78.0)                 |
| 3     | 69.7 / 68.6 / 70.8         | 67.7 / 69.4 / 66.1 | 63.8 / 76.1 / 54.9 | 59.1 (76.6)                 |

Table S6. Repeated results for base-annotated and annotation-free open-world 3D semantic segmentation on ScanNet. Base-annotated results are measured in hIoU / mIoU<sup>B</sup> / mIoU<sup>N</sup>, while annotation-free experiments are measured in mIoU<sup>†</sup> (mAcc<sup>†</sup>).

sofa desk bathtub table toilet sink bookshelf picture cabinet  
 bed chair window counter picture curtain refrigerator shower curtain

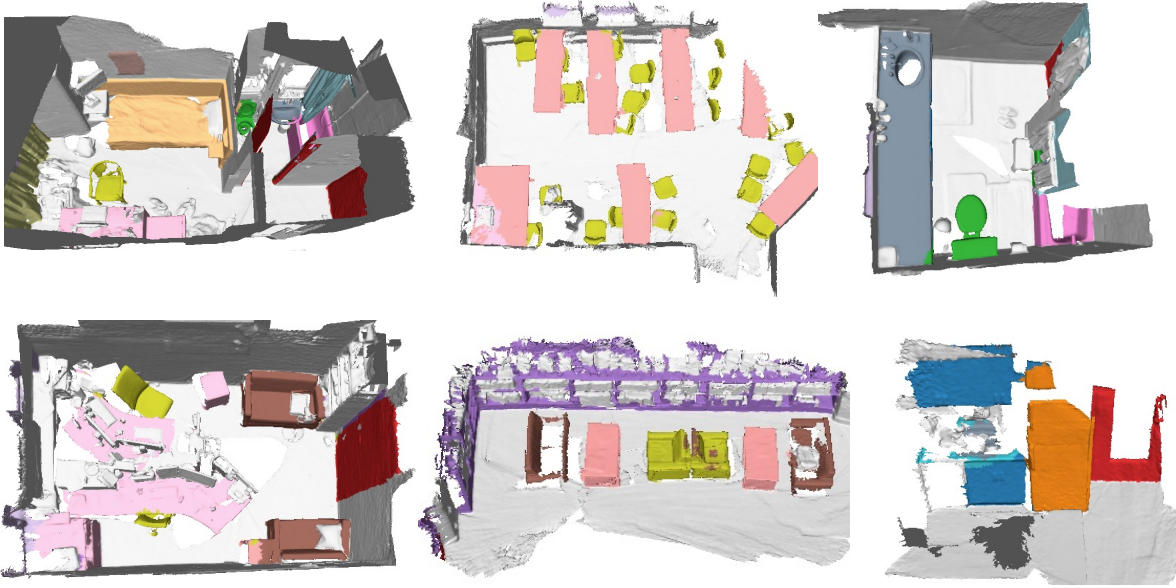

Figure S1. Qualitative results of annotation-free semantic segmentation on ScanNet.

| ScanNet partition | S3DIS Semantic Segmentation |             |                    |
|-------------------|-----------------------------|-------------|--------------------|
|                   | OVSeg-3D [5]                | PLA [5]     | RegionPLC          |
| B15/N4            | 31.1 (46.6)                 | 39.1 (56.2) | <b>52.2 (64.5)</b> |
| B12/N7            | 23.6 (42.7)                 | 35.4 (60.4) | <b>45.0 (61.5)</b> |
| B10/N9            | 36.0 (50.9)                 | 43.7 (60.4) | <b>50.5 (63.2)</b> |
| B0/N17            | 01.7 (11.2)                 | 13.4 (25.1) | <b>50.5 (67.6)</b> |

Table S7. Zero-shot domain transfer results for semantic segmentation in items of mIoU<sup>†</sup> (mAcc<sup>†</sup>) on ScanNet → S3DIS.

175 GPT-3.5 [14], to execute grounded 3D reasoning, a pipeline  
 176 we refer to as RegionGR. The LLM is given human queries  
 177 and regional captions for the purpose of reasoning. Note  
 178 that if a human query pertains to a particular 3D region, we  
 179 will filter captions, retaining only those that show significant  
 180 overlap with the specified 3D region as the input. The  
 181 prompt example we used is as follows.

182 [Role]

You are a household manager. 183  
 Your job is to understand human 184  
 instructions, and you should give 185  
 step-by-step suggestions according 186  
 to the provided environmental 187  
 context. 188  
 189

[Task] 190  
 Your task is to give a suitable 191  
 response to the <question> according 192  
 to the <env\_context>; if possible, 193  
 respond in detail with clear logic. 194  
 Both the question and env context 195  
 are given, delimited by triple 196  
 quotes. 197  
 198

[Env Context] 199  
 Here is the env context, containing 200  
 some words, phrases, or short 201



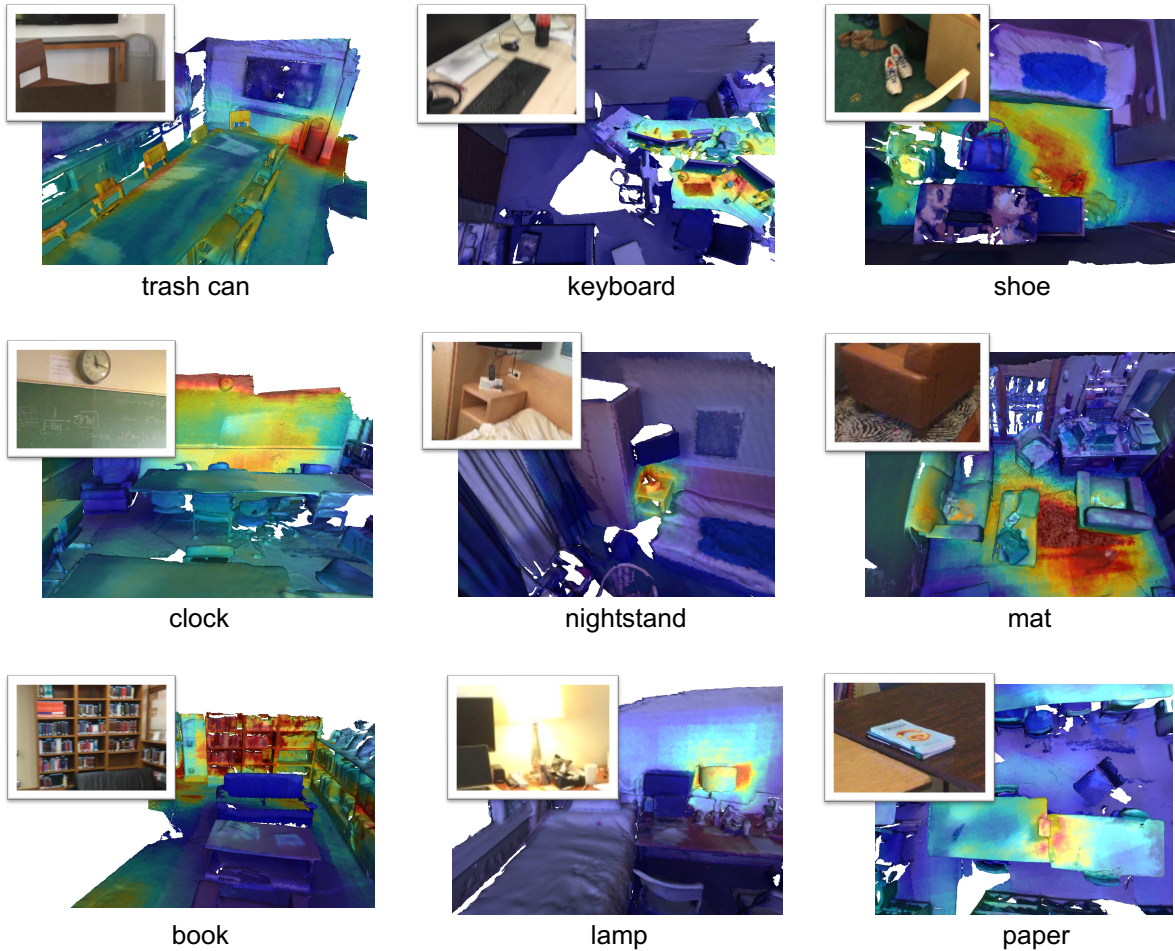

Figure S2. Visualization in heat map of tail classes with the annotation-free model on ScanNet.

202 sentences describing contents in a  
 203 3D room. Answer the user's request  
 204 based on this.  
 205 <{env}>  
 206

207 [Rules]  
 208 Return answers closely related to  
 209 the provided information, especially  
 210 the objects mentioned in the  
 211 provided context. Keep the final  
 212 answer simple and short, within 30  
 213 words. Use natural language like  
 214 humans do in daily life.  
 215

216 [Steps]  
 217 According to the query, understand  
 218 the intention behind "What do I  
 219 want/need to do?" Find the objects  
 220 related to my question from the env  
 221 context. To give the final answer,  
 222 you should tell me the operation  
 223 I need to do and the object I need

224 to interact with. The answer needs  
 225 to be realistic, and the objects in  
 226 your answer need to be based on the  
 227 provided env context.  
 228

229 [Dialog Style]  
 230 You should respond in a polite,  
 231 kind, and natural language tone.  
 232 Try to talk like a human, but  
 233 keep it short.  
 234

235 Begin Task

236  
 237 The question: <{question}>  
 238

## 239 S5. Limitation and Future Works

240 Although our RegionPLC has yielded impressive results  
 241 in 3D open-world scene understanding with a broad spec-  
 242 trum of unseen categories, certain limitations and poten-

tial avenues for enhancement remain. On the one hand, the promising results obtained by the combination of RegionPLC and OpenScene [10] demonstrate the strong potential to introduce 2D image features as auxiliary supervision for training RegionPLC. The current loss combination is straightforward, and we believe that more advanced combination strategies that integrate language, 3D and image features can lead to better performance.

Another aspect warranting improvement is our utilization of visual prompts, which are pre-defined prior to training and remain unchanged throughout the process. Better and more adaptive visual prompting techniques might improve the quality of language supervision. Moving forward, we are interested in further developing an open-world 3D scene understanding framework that addresses these two limitations.

## References

- [1] Vit-gpt2 image captioning. <https://huggingface.co/nlpconnect/vit-gpt2-image-captioning/discussions.3>
- [2] Holger Caesar, Varun Bankiti, Alex H Lang, Sourabh Vora, Venice Erin Liong, Qiang Xu, Anush Krishnan, Yu Pan, Giancarlo Baldan, and Oscar Beijbom. nuscenes: A multi-modal dataset for autonomous driving. In *Proceedings of the IEEE/CVF conference on computer vision and pattern recognition*, pages 11621–11631, 2020. 1, 2
- [3] Bowen Cheng, Ishan Misra, Alexander G. Schwing, Alexander Kirillov, and Rohit Girdhar. Masked-attention mask transformer for universal image segmentation. 2022. 3
- [4] Angela Dai, Angel X Chang, Manolis Savva, Maciej Halber, Thomas Funkhouser, and Matthias Nießner. Scannet: Richly-annotated 3d reconstructions of indoor scenes. In *Proceedings of the IEEE conference on computer vision and pattern recognition*, pages 5828–5839, 2017. 1, 3, 4
- [5] Runyu Ding, Jihan Yang, Chuhui Xue, Wenqing Zhang, Song Bai, and Xiaojuan Qi. Language-driven open-vocabulary 3d scene understanding. *arXiv preprint arXiv:2211.16312*, 2022. 1, 2, 3, 4
- [6] Golnaz Ghiasi, Xiuye Gu, Yin Cui, and Tsung-Yi Lin. Scaling open-vocabulary image segmentation with image-level labels. In *European Conference on Computer Vision*, 2021. 3
- [7] Agrim Gupta, Piotr Dollar, and Ross Girshick. Lvis: A dataset for large vocabulary instance segmentation. In *Proceedings of the IEEE/CVF conference on computer vision and pattern recognition*, pages 5356–5364, 2019. 1
- [8] Krishna Murthy Jatavallabhula, Alihusein Kuwajerwala, Qiao Gu, Mohd Omama, Tao Chen, Shuang Li, Ganesh Iyer, Soroush Saryazdi, Nikhil Keetha, Ayush Tewari, et al. Conceptfusion: Open-set multimodal 3d mapping. *arXiv preprint arXiv:2302.07241*, 2023. 2, 3
- [9] Boyi Li, Kilian Q Weinberger, Serge Belongie, Vladlen Koltun, and Rene Ranftl. Language-driven semantic segmentation. In *International Conference on Learning Representations*, 2022. 3
- [10] Songyou Peng, Kyle Genova, Chiyu Jiang, Andrea Tagliasacchi, Marc Pollefeys, Thomas Funkhouser, et al. Openscene: 3d scene understanding with open vocabularies. *arXiv preprint arXiv:2211.15654*, 2022. 1, 2, 3, 6
- [11] Zhiliang Peng, Wenhui Wang, Li Dong, Yaru Hao, Shaohan Huang, Shuming Ma, and Furu Wei. Kosmos-2: Grounding multimodal large language models to the world. *arXiv preprint arXiv:2306.14824*, 2023. 3
- [12] Alec Radford, Jong Wook Kim, Chris Hallacy, Aditya Ramesh, Gabriel Goh, Sandhini Agarwal, Girish Sastry, Amanda Askell, Pamela Mishkin, Jack Clark, et al. Learning transferable visual models from natural language supervision. In *International Conference on Machine Learning*, pages 8748–8763. PMLR, 2021. 1, 2, 3
- [13] David Rozenberszki, Or Litany, and Angela Dai. Language-grounded indoor 3d semantic segmentation in the wild. In *Computer Vision—ECCV 2022: 17th European Conference, Tel Aviv, Israel, October 23–27, 2022, Proceedings, Part XXXIII*, pages 125–141. Springer, 2022. 1, 2
- [14] John Schulman, Barret Zoph, Christina Kim, Jacob Hilton, Jacob Menick, Jiayi Weng, Juan Felipe Ceron Uribe, Liam Fedus, Luke Metz, Michael Pokornyy, et al. Chatgpt: Optimizing language models for dialogue. *OpenAI blog*, 2022. 4
- [15] Peng Wang, An Yang, Rui Men, Junyang Lin, Shuai Bai, Zhikang Li, Jianxin Ma, Chang Zhou, Jingren Zhou, and Hongxia Yang. Ofa: Unifying architectures, tasks, and modalities through a simple sequence-to-sequence learning framework. *CoRR*, abs/2202.03052, 2022. 1, 3
- [16] Renrui Zhang, Ziyu Guo, Wei Zhang, Kunchang Li, Xupeng Miao, Bin Cui, Yu Qiao, Peng Gao, and Hongsheng Li. Pointclip: Point cloud understanding by clip. In *Proceedings of the IEEE/CVF Conference on Computer Vision and Pattern Recognition*, pages 8552–8562, 2022. 2
- [17] Chong Zhou, Chen Change Loy, and Bo Dai. Extract free dense labels from clip. In *European Conference on Computer Vision (ECCV)*, 2022. 2
- [18] Xingyi Zhou, Rohit Girdhar, Armand Joulin, Philipp Krähenbühl, and Ishan Misra. Detecting twenty-thousand classes using image-level supervision. In *ECCV*, 2022. 1, 3
